# Supplementary material
Source: publisher figshare collection journal article supplement (https://frontiersin.figshare.com/ndownloader/files/12461069)
Supplement: Supplementary file [file 12461069]

**The details of material characterization:**  $^1\text{H}$ -NMR spectra were characterized by a Bruker spectrometer (AVANCE-III 400 MHz) at 25 °C using deuterated chloroform ( $\text{CDCl}_3$ ) as the solvent. FT-IR spectra were recorded on the Bruker TENSOR II at a signal-to-noise ratio of 32,000:1 and a resolution of 0.5  $\text{cm}^{-1}$ . XRD experiments were conducted on a Bruker D8 ADVANCE with a rotating anode emitting X-rays  $\text{Cu-K}\alpha$  radiation ( $\lambda=0.154 \text{ nm}$ ) and were used to measure the crystallization of the elastomers. 2D XRD patterns were measured by using an image plate after an exposure time of 1 h. After the material was made to be a nanosheet with a freshly cut surface at -60 °C using an ultramicrotome (Leica EMUC7) and dyed by  $\text{OsO}_4$  to distinguish the soft segment to hard segment, TEM analysis was performed on a JEOL JEM3010 at the acceleration voltage of 200 kV. Differential scanning calorimetry (DSC) were performed using a METTLER-TOLEDO STAR<sup>e</sup> system. Samples were heated from room temperature to 150 °C and cooled to -100 °C to eliminate the heat history, and ramped up to 150 °C at the rate of 10 °C  $\text{min}^{-1}$ . Thermogravimetric analysis (TGA) was carried out using a METTLER-TOLEDO STAR<sup>e</sup> system under a nitrogen atmosphere. The heating procedure for the samples was from 25 °C to 800 °C at a rate of 10 °C per min. Dynamic mechanical analyze (DMA) was performed on a 01 dB-metravib VA3000 with a temperature sweep from -125 °C to 125 °C to measure the loss factor  $\tan \delta$ , the strain  $\epsilon$  was 0.1% and the frequency  $F$  was 1 Hz. A Bruker Q400 was used to test the thermomechanical properties from 0 °C to 250 °C at the heating rate of 5 °C  $\text{min}^{-1}$ . Tear tests and Tensile were performed according to ISO standard 34-1:2004 and ISO standard 37:2005, respectively, by using a universal testing machine (LRX Plus/ LLOYD LRX/ MTS CMT4104). The abrasion test, according to

ISO standard 5470, was conducted on a MINGZHU MZ-4061 Akron abrasion tester. The rolling resistance test to measure the power loss and temperature increase of the wheels were carried out on a WANHUI RSS-II tester with a 30 kg loading at the rotate speed of 600 rpm. After the sample was processed by sodium bicarbonate and isopropanol for 24 h, a pendulum friction coefficient tester (LEIYUN BM-III) was used to measure the pendulum-type friction coefficient.
